# Supplementary material for: Krüppel-like factor 4 (KLF4) regulates the miR-183~96~182 cluster under physiologic and pathologic conditions
Source: PubMed Central journal article supplement (PMC5432258; doi:10.18632/oncotarget.15459), 2017-02-17
Supplement: oncotarget-08-26298-s001.pdf [file oncotarget-08-26298-s001.pdf]

## Krüppel-like factor 4 (KLF4) regulates the miR-183~96~182 cluster under physiologic and pathologic conditions

### Supplementary Materials

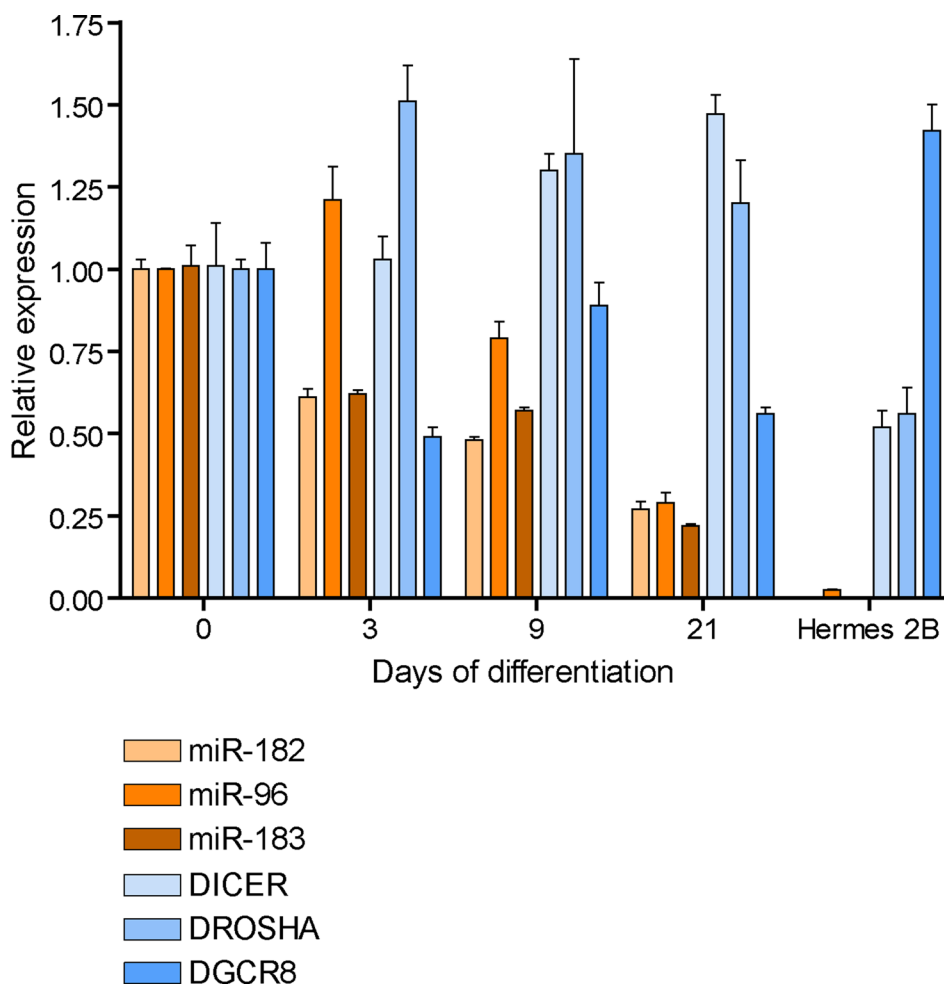

**Supplementary Figure 1: miRNA processing machinery component expression is not altered during hESC differentiation to melanocytes.** mRNA levels of DROSHA, DICER and DGCR8 were measured by qPCR in a hESCs to melanocyte differentiation time course. The levels of mature forms of the miR-183, miR-96 and miR-182 were also analyzed by qPCR. Expression values were normalized versus normal melanocytes.

**A**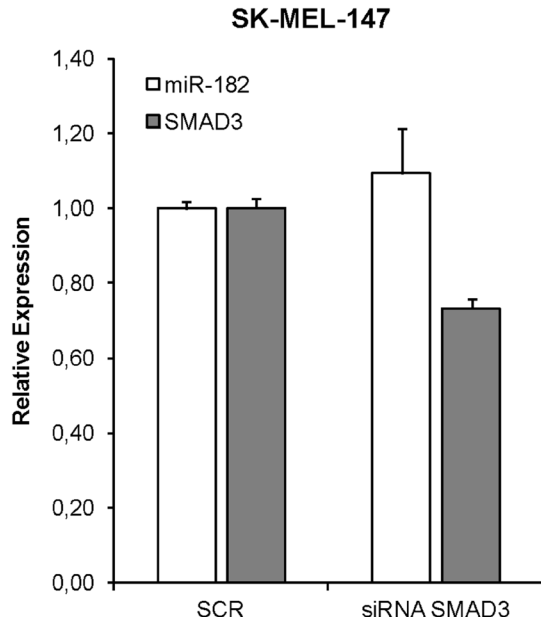**B**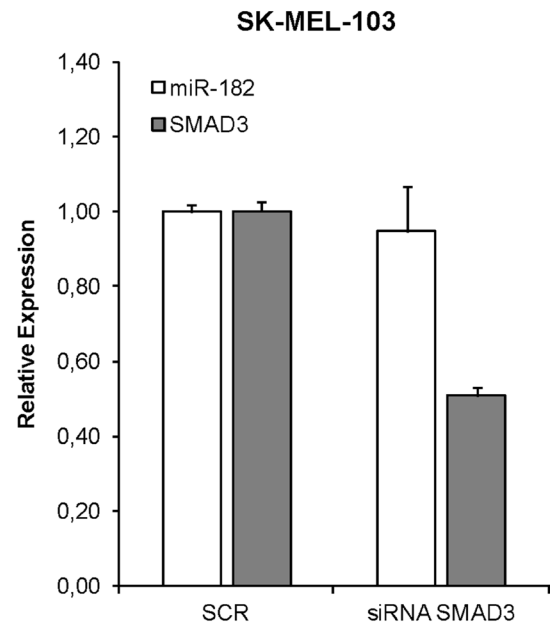

**Supplementary Figure 2: SMAD3 does not regulate miR-182 levels in melanoma.** Relative expression levels of miR-182 and SMAD3 analyzed by qPCR after transfection of SK-MEL-147 (A) or SK-MEL-103 (B) melanoma cell lines with siRNA scrambled or siRNA against SMAD3.

**Supplementary Table 1: TFs present in the 0.8 Kb region upstream the miR-183~96~182 cluster promoter TSS**

| Transcription Factor | Strand | Matrix sim. | Core sim. | Sequence                        | # Sites in human | # Sites in Mouse |
|----------------------|--------|-------------|-----------|---------------------------------|------------------|------------------|
| SP1                  | -      | 0.985       | 1         | gggGGGAggggaagt                 | 12               | 5                |
| ZBP89 (ZNF148)       | +      | 0.952       | 1         | cgctccccCCCCctccctctc           | 5                | 6                |
| ZNF219               | -      | 0.971       | 1         | ggagccgCCCCcagaccgttcc          | 5                | 6                |
| MAZ                  | -      | 0.986       | 1         | gaggGAGGgggag                   | 9                | 5                |
| CTCF                 | -      | 0.913       | 0.958     | gcagggggcggccGGGgatgacc         | 8                | 4                |
| CKROX                | -      | 0.973       | 1         | agggGGGAggggaagtg               | 6                | 4                |
| KLF6                 | -      | 0.945       | 0.958     | ggcaGGGGcgggccgg                | 5                | 4                |
| EGR1                 | -      | 0.831       | 0.75      | ggctgcgcGGGGctcg                | 4                | 4                |
| KKLF                 | +      | 0.989       | 1         | gggggagGGGgagatgg               | 8                | 3                |
| WT1                  | -      | 0.942       | 1         | ctgggAGGGgggagggg               | 7                | 3                |
| HIC1                 | -      | 0.85        | 0.75      | cgggcTGCCcgga                   | 3                | 3                |
| E2F                  | +      | 0.771       | 0.78      | ggggggcggTAAAacc                | 2                | 3                |
| MZF1                 | -      | 0.946       | 1         | gaGGGgagccg                     | 7                | 2                |
| PLAG1                | +      | 0.985       | 1         | GAGGgcaggagcgggatag             | 6                | 2                |
| GC                   | -      | 0.992       | 1         | agagGGAGggggaggg                | 3                | 2                |
| AP1                  | +      | 0.882       | 0.961     | ggtgAATCac                      | 2                | 2                |
| XCPE1                | +      | 0.865       | 0.811     | ggCGGggccc                      | 2                | 2                |
| PAX5                 | -      | 0.887       | 1         | ctggggCGCAccgtagggccactggacga   | 2                | 2                |
| RREB1                | +      | 0.888       | 1         | cCCCAttccagccct                 | 2                | 2                |
| VDR_RXR              | +      | 0.955       | 1         | gagggtgggcgtgGAGGacatgga        | 2                | 2                |
| NRSE                 | +      | 0.938       | 1         | ccgggcccacctCGGctagcggcaccttagc | 3                | 2                |
| AHRARNT              | +      | 0.994       | 1         | ccgagggtggCGTgtgagacatg         | 4                | 1                |
| CDE                  | -      | 0.879       | 0.75      | ggggCGCGggctg                   | 3                | 1                |
| PAX9                 | +      | 0.918       | 1         | ggCACcctagcccagggcag            | 3                | 1                |
| PURALPHA             | -      | 0.903       | 1         | ggAGGGggagggg                   | 3                | 1                |
| AP2                  | +      | 0.911       | 0.807     | gggGCCCGggggcggg                | 2                | 1                |
| ARE                  | -      | 0.977       | 1         | aggggcctccatGTCCtca             | 2                | 1                |
| EKLF                 | +      | 0.924       | 1         | cctcccaGGGTgggatt               | 2                | 1                |
| GRHL1                | -      | 0.892       | 1         | ggctccGGTtgg                    | 2                | 1                |
| OLF1                 | -      | 0.91        | 1         | tgtctgTCCCaagaggggaggg          | 2                | 1                |
| SMAD3                | -      | 0.928       | 1         | tGTCTggcc                       | 2                | 1                |
| TIEG (KLF10)         | -      | 0.997       | 1         | gaGGTgtgtgtggcg                 | 2                | 1                |
| ZNF300               | +      | 0.952       | 1         | ctacgggtgcCCCCagctcccaa         | 2                | 1                |
| AP4                  | +      | 0.996       | 1         | ggcggCAGCggtggcca               | 1                | 2                |
| AREB6 (ZEB1)         | +      | 0.985       | 1         | cagaCACctgtga                   | 1                | 2                |
| ATF6                 | -      | 0.877       | 1         | gtggcgtGGCGtgettga              | 1                | 2                |
| BACH1                | +      | 0.898       | 0.959     | tcaaggTGAAtatccccggc            | 1                | 1                |
| BKLF                 | +      | 0.958       | 1         | cgaGGGTgggcgtgtga               | 1                | 1                |
| CDP                  | +      | 0.893       | 0.833     | ctgagcCAATggcctgcg              | 1                | 1                |
| CEBPB                | +      | 0.973       | 1         | cgggttggGCAAga                  | 1                | 1                |
| CMYB                 | +      | 0.958       | 1         | acCAACcggagcc                   | 1                | 1                |
| DEC2                 | +      | 0.797       | 0.844     | gcggcaCCTGagcca                 | 1                | 1                |
| E2F1_DP2             | +      | 0.797       | 1         | agaaGGCGggcgacggg               | 1                | 1                |
| FXRE                 | +      | 0.839       | 0.96      | AGGTgaatcatcc                   | 1                | 1                |
| KLF4                 | -      | 0.743       | 1         | aagagagggAGGGggag               | 1                | 1                |
| GLI3                 | -      | 0.951       | 1         | acgcCCAacctcgc                  | 1                | 1                |
| GLIS3                | -      | 0.831       | 0.789     | accgCCCCcggcccc                 | 1                | 1                |
| HBP1                 | -      | 0.836       | 0.765     | gtgcacagagAATGactccagga         | 1                | 1                |
| HNF4                 | -      | 0.961       | 1         | ccgcccggaaCAAAggctgtctg         | 1                | 1                |
| HOXB9                | +      | 0.902       | 0.778     | ggggcggTAAAaccct                | 1                | 1                |
| HPF1 (ZNF83)         | -      | 0.87        | 1         | ggaatggggacAAGGgacctcatg        | 1                | 1                |
| IRF4                 | -      | 0.859       | 0.767     | cacaGAGAatgactccaggag           | 1                | 1                |
| LEF1                 | -      | 0.97        | 1         | ccgggaaCAAAggctgt               | 1                | 1                |
| MIF1                 | -      | 0.923       | 1         | acaggtgtctgGCCaccg              | 1                | 1                |
| MOK2                 | +      | 0.903       | 1         | tcagccttgagcaCCTTctg            | 1                | 1                |
| MYC/MAX.03           | +      | 0.783       | 0.75      | cagccgCGCGgtc                   | 1                | 1                |
| NF1                  | +      | 0.991       | 1         | cccTTGTcccattccagccc            | 1                | 1                |
| NFKAPPAB50           | -      | 0.863       | 1         | gccGGGAgcccgg                   | 1                | 1                |

**Supplementary Table 2: TFs with a positive correlation with miR-182 levels in melanoma cell lines without 7q amplification.**

| Gene          | Correlation | Human Sites | Mouse Sites |
|---------------|-------------|-------------|-------------|
| <i>SMAD3</i>  | 0.89        | 2           | 1           |
| <i>BACH1</i>  | 0.86        | 1           | 1           |
| <i>PAX9</i>   | 0.84        | 3           | 1           |
| <i>HPF1</i>   | 0.83        | 1           | 1           |
| <i>CEBPB</i>  | 0.80        | 1           | 1           |
| <i>ATF6</i>   | 0.78        | 1           | 2           |
| <i>RREB1</i>  | 0.76        | 2           | 2           |
| <i>ZBP89</i>  | 0.74        | 5           | 6           |
| <i>KLF10</i>  | 0.69        | 2           | 1           |
| <i>NF1</i>    | 0.68        | 1           | 1           |
| <i>KLF4</i>   | 0.66        | 1           | 1           |
| <i>CUX1</i>   | 0.59        | 1           | 1           |
| <i>ZEB1</i>   | 0.58        | 1           | 2           |
| <i>KLF3</i>   | 0.57        | 1           | 1           |
| <i>GC</i>     | 0.57        | 3           | 2           |
| <i>ZNF219</i> | 0.52        | 5           | 6           |

**Supplementary Table 3: Coordinates of loci bound by transcription factors in the miR-182 cluster promoter in mouse ES cells**

| Transcription Factor | Coordinates            | CpG island |
|----------------------|------------------------|------------|
| <i>Esrrb</i>         | chr6:30121639-30121639 | No         |
|                      | chr6:30124289-30124291 | Yes        |
| <i>Ctcf</i>          | chr6:30123282-30123283 | No         |
| <i>E2f1</i>          | chr6:30121816-30121831 | No         |
|                      | chr6:30123098-30123105 | Yes        |
|                      | chr6:30124431-30124433 | Yes        |
|                      | chr6:30125543-30125544 | No         |
| <i>Tcfcp2l1</i>      | chr6:30123083-30123094 | Yes        |
|                      | chr6:30124349-30124383 | Yes        |
|                      | chr6:30125867-30125867 | No         |
| <i>Zfx</i>           | chr6:30124660-30124663 | No         |
|                      | chr6:30125631-30125631 | No         |
| <i>Klf4</i>          | chr6:30121414-30121420 | No         |
|                      | chr6:30123218-30123226 | Yes        |
|                      | chr6:30124307-30124313 | Yes        |
|                      | chr6:30124815-30124885 | No         |
|                      | chr6:30125811-30125845 | No         |

miR-182 cluster locus: chr6:30120000-30126000.

**Supplementary Table 4: Primers used for qPCR analysis**

| Gene symbol   | Sequence (5' to 3') |                                                        |
|---------------|---------------------|--------------------------------------------------------|
| <i>KLF2</i>   | Fw:<br>Rv:          | CACCAAGAGTTCGCATCTGA<br>GGCTACATGTGCCGTTTCAT           |
| <i>KLF5</i>   | Fw:<br>Rv:          | CCTGGTCCAGACAAGATGTG<br>GTCAGGGAGGAAGACGTTCA           |
| <i>KLF4</i>   | Fw:<br>Rv:          | ACACGAAAAGCTCCCATTTG<br>TGTCCGGTGTGTTTCCTGTA           |
| <i>MITF-M</i> | Fw:<br>Rv:          | CTACCGTCTCTCACTGGATTGGTGC<br>GCTTGCTGTATGTGGTACTTGGTGG |
| <i>GAPDH</i>  | Fw:<br>Rv:          | CGCTCTGCTCCTCCTGTT<br>CCATGGTGTCTGAGCGATGT             |
